# Supplementary material for: High-performance spinel NiMn2O4 microspheres self-assembled with nanosheets by microwave-assisted synthesis for supercapacitors
Source: Royal Society of Chemistry journal article supplement (doi:10.1039/c9ce01623f), 2019-12-04
Supplement: c9ce01623f1.pdf [file c9ce01623f1.pdf]

# High-performance Spinel NiMn<sub>2</sub>O<sub>4</sub> Hierarchical Microspheres Self-assembled with Nanosheets by Microwave-assisted Synthesis for Supercapacitor

Yin Sun, Junjie Zhang, Xiannian Sun\*, Naibao Huang\*  
(College of Transportation Engineering,  
Dalian Maritime University, Dalian 116026, China)

Tab.S1 The elemental content distribution of NiMn<sub>2</sub>O<sub>4</sub> determined by XPS.

| Element  | Ni    | Mn    | O     |
|----------|-------|-------|-------|
| Atomic % | 14.61 | 28.93 | 56.46 |

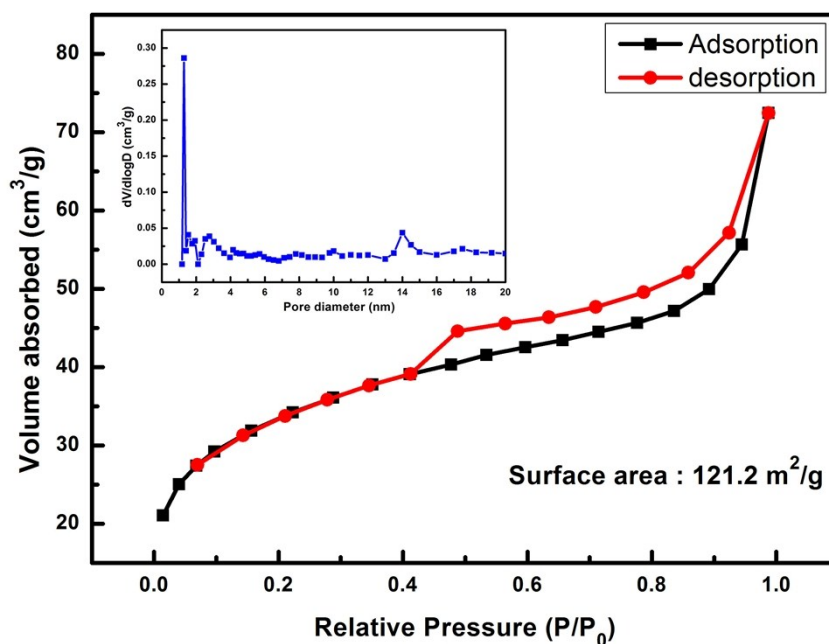

Fig.S1 N<sub>2</sub> adsorption-desorption isotherm of the as-prepared NiMn<sub>2</sub>O<sub>4</sub> (Insert shows the pore size distribution curve).

Tab.S2 Supercapacitor performances of NiMn<sub>2</sub>O<sub>4</sub>-based electrode materials prepared by different methods reported in the literature.

| Structure of NiMn <sub>2</sub> O <sub>4</sub> based material | Method of synthesis                    | Specific capacitance    | Retention                                   | Electrolyte                         | Potential window     | Reference        |
|--------------------------------------------------------------|----------------------------------------|-------------------------|---------------------------------------------|-------------------------------------|----------------------|------------------|
| NiMn <sub>2</sub> O <sub>4</sub>                             | Sol-gel process                        | 243 F/g (5mV/s)         | 96 %<br>(5000 cycles @ 20mV/s)              | 1 M Na <sub>2</sub> SO <sub>4</sub> | -0.2 ~ 0.8 V         | 1                |
| NiMn <sub>2</sub> O <sub>4</sub>                             | Spray pyrolysis                        | 460 F/g (5mV/s)         | 92.97 %<br>(1000 cycles @ 2A/g)             | 2 M KOH                             | -0.2 ~ 0.4 V         | 2                |
| NiMn <sub>2</sub> O <sub>4</sub>                             | Hydrothermal                           | 662 F/g (1A/g)          | 95.7 %<br>(1000 cycles @ 10A/g)             | 6 M KOH                             | -0.2 ~ 0.6 V         | 3                |
| NiMn <sub>2</sub> O <sub>4</sub>                             | Electrospinning process                | 410 F/g (1A/g)          | ~95%<br>(5000 cycles@ 5A/g)                 | 1M KCl                              | 0 ~ 1 V              | 4                |
| Ni-Mn-O                                                      | Hydrothermal                           | 284 F/g (5mV/s)         | 96%<br>(1500 cycles@ 50mV/s)                | 2 M NaCl                            | 0 ~ 1 V              | 5                |
| C@NiMn <sub>2</sub> O <sub>4</sub>                           | Hydrothermal                           | 471 F/g (1A/g)          | 89.6%<br>(5000 cycles@ 10A/g)               | 2 M KOH                             | 0 ~ 0.45 V           | 6                |
| RGO/NiMn <sub>2</sub> O <sub>4</sub>                         | Coprecipitation                        | 693 F/g (1A/g)          | 91.4 %<br>(2000 cycles @ 5A/g)              | 1 M Na <sub>2</sub> SO <sub>4</sub> | 0 ~ 0.9V             | 7                |
| <b>NiMn<sub>2</sub>O<sub>4</sub></b>                         | <b>Microwave assisted hydrothermal</b> | <b>768.9 F/g (1A/g)</b> | <b>85.8%</b><br><b>(6000 cycles @ 5A/g)</b> | <b>6 M KOH</b>                      | <b>-0.2 ~ 0.45 V</b> | <b>This work</b> |

Tab.S3 Summary the values of different components in the fitting of EIS data.

| Parameter          | Value | Deviation |
|--------------------|-------|-----------|
| R <sub>1</sub> (Ω) | 0.096 | 0.223     |
| C <sub>2</sub> (F) | 0.113 | 0.269     |
| R <sub>2</sub> (Ω) | 0.103 | 1.481     |
| C <sub>3</sub> (F) | 0.128 | 0.196     |
| R <sub>3</sub> (Ω) | 0.102 | 0.439     |

## References

1. M. Zhang, S. Guo, L. Zheng, G. Zhang, Z. Hao, L. Kang and Z.-H. Liu, *Electrochimica Acta*, 2013, **87**, 546-553.
2. U. J. Chavan and A. A. Yadav, *Journal of Materials Science: Materials in Electronics*, 2016, **28**, 4958-4964.
3. H. M. Wei, J. X. Wang, L. Yu, Y. Y. Zhang, D. W. Hou and T. F. Li, *Ceramics International*, 2016, **42**, 14963-14969.
4. J. Bhagwan, S. Rani, V. Sivasankaran, K. L. Yadav and Y. Sharma, *Applied Surface Science*, 2017, **426**, 913-923.
5. C. H. Wu, J. S. Ma and C. H. Lu, *Current Applied Physics*, 2012, **12**, 1190-1194.
6. M. R. Kim, R. M. NaiduKalla, S. Kim, M.-R. Kim and I. Kim, *ChemElectroChem*, 2017, **4**, 1214-1221.
7. Z. Wang, Z. Zhu, C. Zhang, C. Xu and C. Chen, *Electrochimica Acta*, 2017, **230**, 438-444.
